# Supplementary material for: The Impact of Real-Time CPR Feedback Devices on Chest Compression Quality and Neurologic Outcomes in Pediatric Out-of-Hospital Cardiac Arrest: A Systematic Review and Meta-Analysis
Source: Research Square preprint supplement (doi:10.21203/rs.3.rs-8180154/v1), 2025-11-25
Supplement: Supplementary file 1 [file 7d46222b4feaf04c8f45028a.docx]

**Supplementary File 1: Complete Search Strategies for All Databases**

**Search Date:**

**Time Frame:** January 1, 2015 – December 31, 2024

The following search strategies were used for each database. Filters for publication date and English language were applied where available.

**1. PubMed/MEDLINE (via NCBI)**

("cardiopulmonary resuscitation"[MeSH Terms] OR "cardiopulmonary resuscitation"[tiab] OR "CPR"[tiab] OR "chest compression"[tiab] OR "chest compressions"[tiab])

AND

("feedback"[MeSH Terms] OR "real-time feedback"[tiab] OR "audiovisual feedback"[tiab] OR "CPR feedback"[tiab] OR "CPR coach"[tiab] OR "feedback device"[tiab] OR "sensor-guided CPR"[tiab])

AND

("out-of-hospital cardiac arrest"[tiab] OR "OHCA"[tiab] OR "prehospital cardiac arrest"[tiab] OR "Heart Arrest"[MeSH] OR "Emergency Medical Services"[MeSH])

AND

("child"[MeSH Terms] OR "pediatric"[tiab] OR "paediatric"[tiab] OR "child"[tiab] OR "children"[tiab] OR "infant"[tiab] OR "adolescent"[tiab])

)

AND

(2015/01/01[Date - Publication] : 2024/12/31[Date - Publication])

AND

(english[lang])

**2. EMBASE (via Ovid)**

1. exp cardiopulmonary resuscitation/

2. (cardiopulmonary resuscitation or CPR or chest compression).ti,ab,kw.

3. 1 or 2

4. exp feedback/

5. (real-time feedback or audiovisual feedback or CPR feedback or CPR coach or feedback device or sensor-guided CPR).ti,ab,kw.

6. 4 or 5

7. exp heart arrest/

8. (out-of-hospital cardiac arrest or OHCA or prehospital cardiac arrest).ti,ab,kw.

9. 7 or 8

10. exp child/ or exp pediatrics/

11. (pediatric or paediatric or child or children or infant or adolescent).ti,ab,kw.

12. 10 or 11

13. 3 and 6 and 9 and 12

14. limit 13 to (yr="2015 - 2024" and english language and human)

**3. Cochrane Central Register of Controlled Trials (CENTRAL, via Wiley)**

#1 MeSH descriptor: [Cardiopulmonary Resuscitation] explode all trees

#2 (cardiopulmonary resuscitation OR CPR OR chest compression):ti,ab,kw

#3 #1 OR #2

#4 MeSH descriptor: [Feedback] explode all trees

#5 (real-time feedback OR audiovisual feedback OR CPR feedback OR CPR coach OR feedback device OR sensor-guided CPR):ti,ab,kw

#6 #4 OR #5

#7 MeSH descriptor: [Heart Arrest] explode all trees

#8 (out-of-hospital cardiac arrest OR OHCA OR prehospital cardiac arrest):ti,ab,kw

#9 #7 OR #8

#10 MeSH descriptor: [Child] explode all trees

#11 (pediatric OR paediatric OR child OR children OR infant OR adolescent):ti,ab,kw

#12 #10 OR #11

#13 #3 AND #6 AND #9 AND #12

#14 (Publication Year from 2015 to 2024)

**4. Web of Science Core Collection**

#1 TS=("cardiopulmonary resuscitation" OR CPR OR "chest compression")

#2 TS=("real-time feedback" OR "audiovisual feedback" OR "CPR feedback" OR "CPR coach" OR "feedback device" OR "sensor-guided CPR")

#3 TS=("out-of-hospital cardiac arrest" OR OHCA OR "prehospital cardiac arrest")

#4 TS=(pediatric OR paediatric OR child OR children OR infant OR adolescent)

#5 #1 AND #2 AND #3 AND #4

#6 PY=(2015-2024) AND LA=(English)

**5. Scopus (via Elsevier)**

( TITLE-ABS-KEY ( "cardiopulmonary resuscitation" OR cpr OR "chest compression" ) AND TITLE-ABS-KEY ( "real-time feedback" OR "audiovisual feedback" OR "cpr feedback" OR "cpr coach" OR "feedback device" OR "sensor-guided cpr" ) AND TITLE-ABS-KEY ( "out-of-hospital cardiac arrest" OR ohca OR "prehospital cardiac arrest" ) AND TITLE-ABS-KEY ( pediatric OR paediatric OR child OR children OR infant OR adolescent ) ) AND PUBYEAR > 2014 AND PUBYEAR < 2025 AND ( LIMIT-TO ( LANGUAGE , "English" ) )

**6. CINAHL (via EBSCOhost)**

S1 (MH "Cardiopulmonary Resuscitation+")

S2 TI ( "cardiopulmonary resuscitation" OR CPR OR "chest compression" ) OR AB ( "cardiopulmonary resuscitation" OR CPR OR "chest compression" )

S3 S1 OR S2

S4 (MH "Feedback+")

S5 TI ( "real-time feedback" OR "audiovisual feedback" OR "CPR feedback" OR "CPR coach" OR "feedback device" ) OR AB ( "real-time feedback" OR "audiovisual feedback" OR "CPR feedback" OR "CPR coach" OR "feedback device" )

S6 S4 OR S5

S7 (MH "Heart Arrest+")

S8 TI ( "out-of-hospital cardiac arrest" OR OHCA OR "prehospital cardiac arrest" ) OR AB ( "out-of-hospital cardiac arrest" OR OHCA OR "prehospital cardiac arrest" )

S9 S7 OR S8

S10 (MH "Child+") OR (MH "Pediatrics+")

S11 TI ( pediatric OR paediatric OR child OR children OR infant OR adolescent ) OR AB ( pediatric OR paediatric OR child OR children OR infant OR adolescent )

S12 S10 OR S11

S13 S3 AND S6 AND S9 AND S12

S14 EM 20150101-20241231

S15 LA English

**7.** [**ClinicalTrials.gov**](https://ClinicalTrials.gov)

- **Search Terms:** (CPR OR "cardiopulmonary resuscitation") AND (feedback OR "real-time feedback") AND (pediatric OR child) AND "cardiac arrest"
- **Status:** All
- **Intervention/Treatment:** (CPR OR "cardiopulmonary resuscitation") AND (feedback)
- **Other Terms:** (pediatric OR child) AND "cardiac arrest"
- **This registry was searched manually using a combination of terms due to its less structured interface.**
